# Supplementary material for: In situ growth of the CoO nanoneedle array on a 3D nickel foam toward a high-performance glucose sensor
Source: Royal Society of Chemistry journal article supplement (doi:10.1039/d2dt03877c), 2023-01-01
Supplement: d2dt03877c1.pdf [file d2dt03877c1.pdf]

## In situ growth of the CoO nanoneedles array on a 3D nickel foam toward a high-performance glucose sensor

Yue Zhang,<sup>a</sup> Pengkun Xia,<sup>b</sup> Hui Fan,<sup>b</sup> Xiaohui Gao,<sup>\*a</sup> Fangping Ouyang,<sup>a</sup> Wei Chen<sup>c</sup>

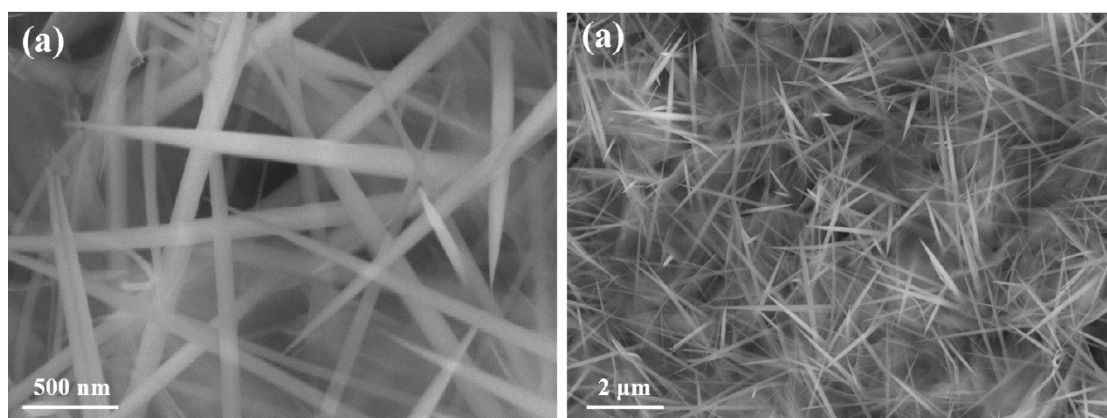

Figure S1. SEM images with different magnification for precursor materials.

<sup>a</sup>School of Physics and Electronics, Hunan Key Laboratory for Super-Microstructure and Ultrafast Process, and Hunan Key Laboratory of Nanophotonics and Devices, Central South University, Changsha 410083, People's Republic of China

<sup>b</sup>Hunan Provincial Key Laboratory of Advanced Materials for New Energy Storage and Conversion, School of Materials Science and Engineering, Hunan University of Science and Technology, Xiangtan 411201, People's Republic of China

<sup>c</sup>School of Chemistry and Pharmaceutical Sciences, Guangxi Normal University, Guilin 541004, People's Republic of China

\*Corresponding author: Xiaohui Gao Email: [xiaohuigao@csu.edu.cn](mailto:xiaohuigao@csu.edu.cn)

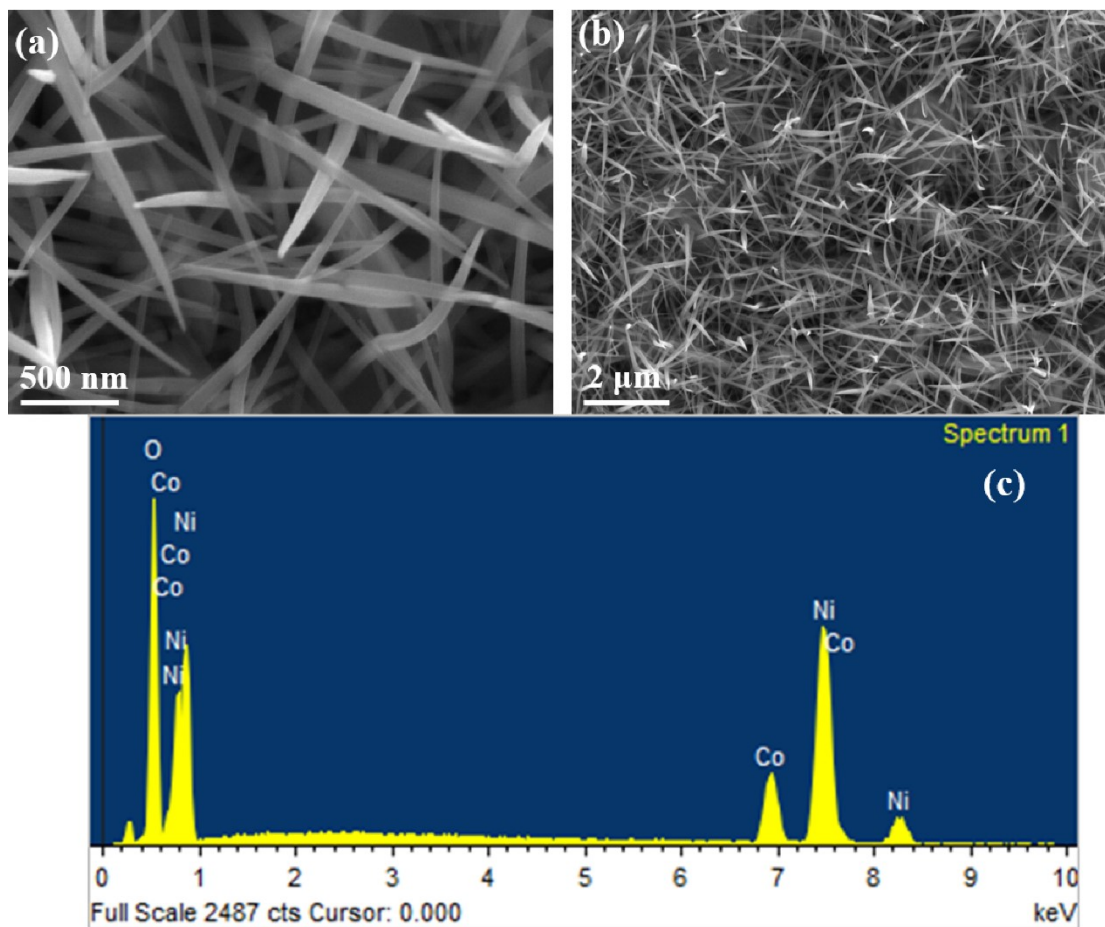

Figure S2. (a),(b) SEM images with different magnification and (c) corresponding EDS pattern for CoO-300 nanoneedles.

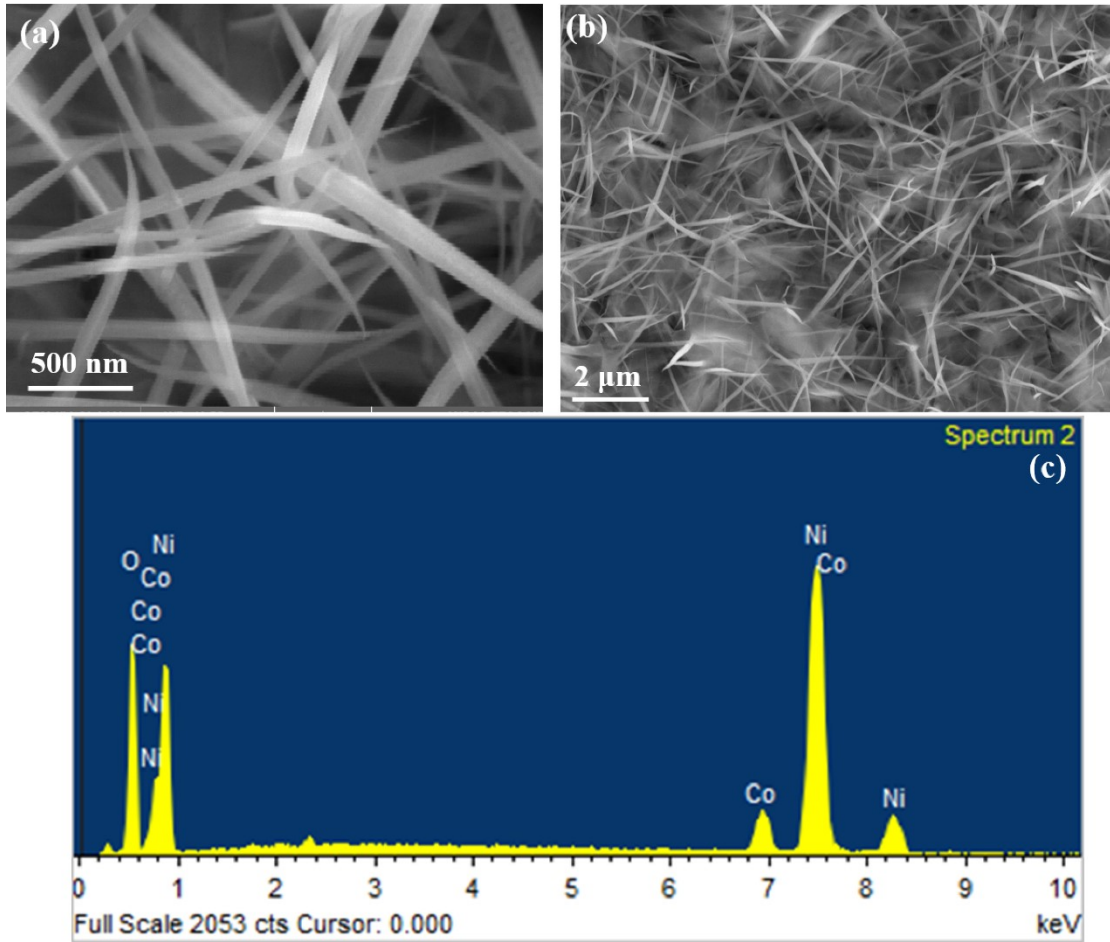

Figure S3. (a),(b) SEM images with different magnification and (c) corresponding EDS pattern for CoO-500 nanoneedles.

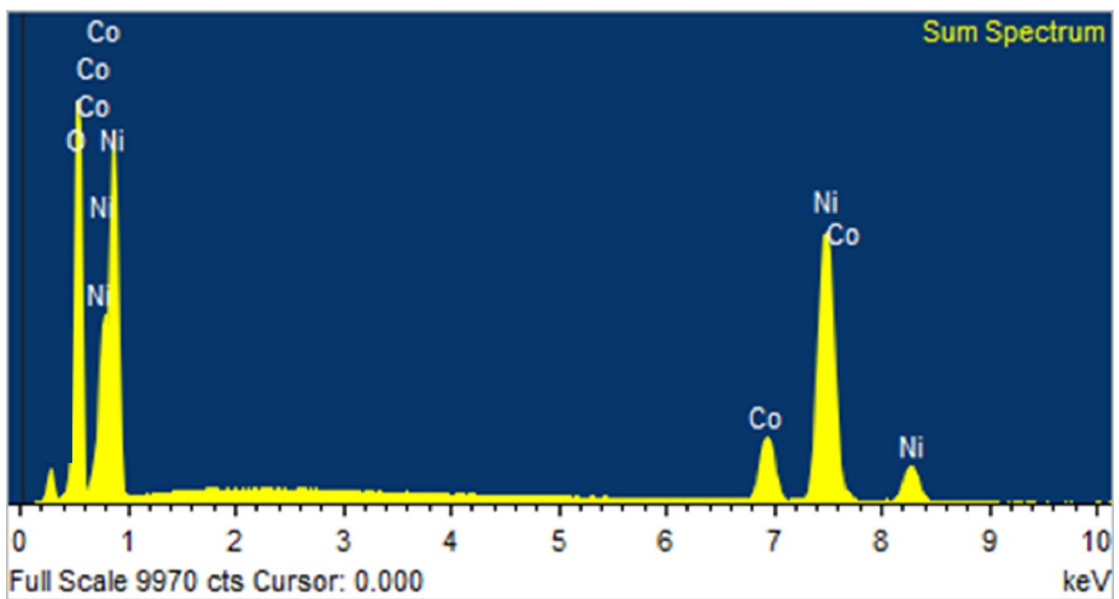

Figure S4. EDS pattern for CoO-400 nanoneedles.

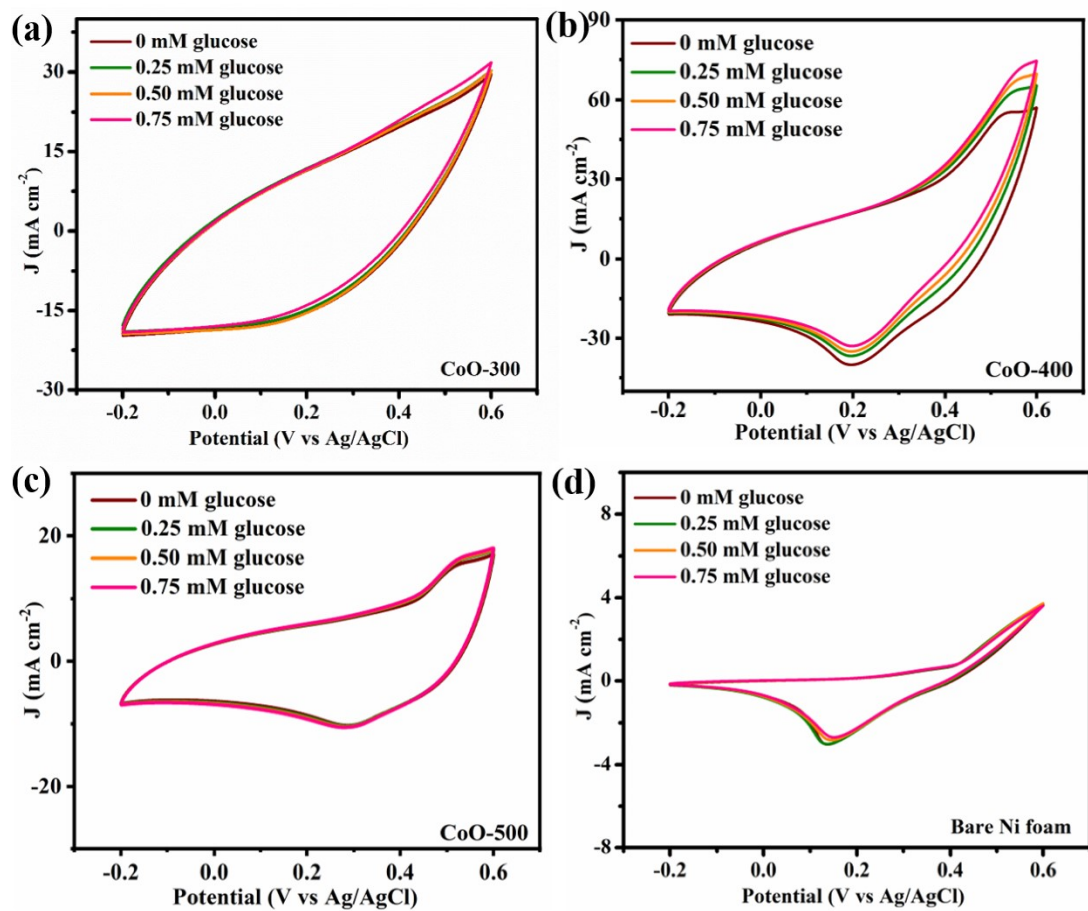

Figure S5. The CV curves at different concentrations of glucose (0 mM, 0.25 mM, 0.50 mM and 0.75 mM) for (a) CoO-300, (b) CoO-400, (c) CoO-500 and (d) bare Ni foam.

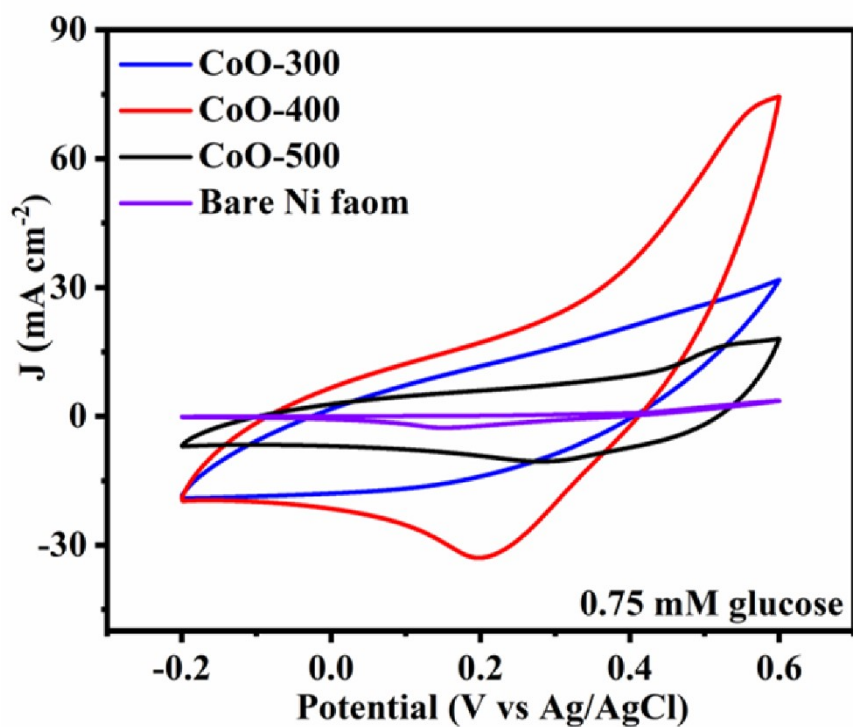

Figure S6. CV comparison curves of three samples and bare Ni foam in the 0.1 M KOH with 0.75 mM glucose.

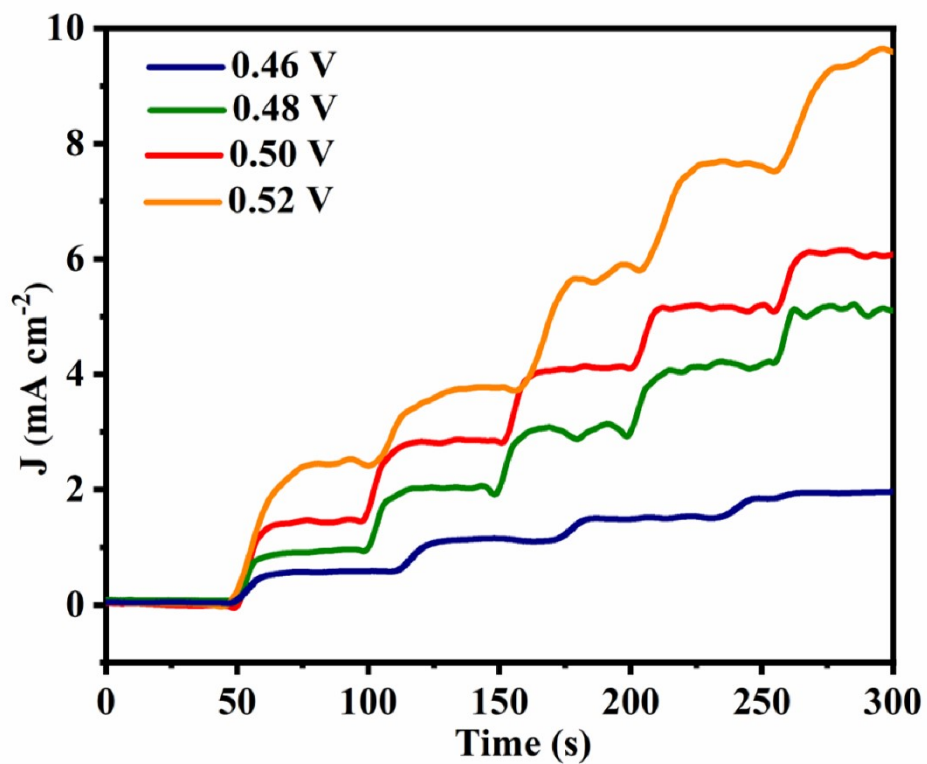

Figure S7. Amperometric response of CoO-400 electrode at various potentials ranging

from 0.46 V to 0.52 V in 0.1 M KOH with a consecutive addition of 0.01 mM glucose.

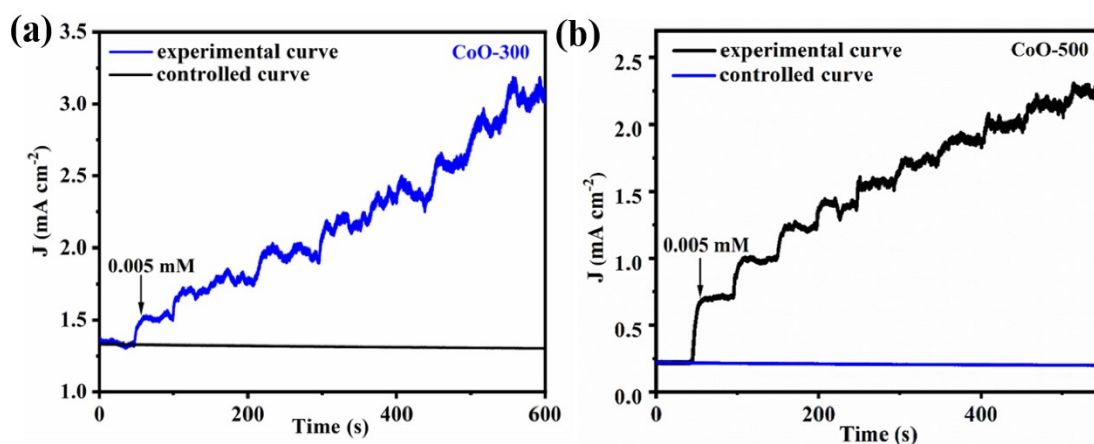

Figure S8. Current-time (i-t) curves with introduction of glucose for (a) CoO-300 nanoneedles (black curve: blank test without the addition of glucose for CoO-300) and (b) CoO-500 nanoneedles (blue curve: blank test without the addition of glucose for CoO-500)

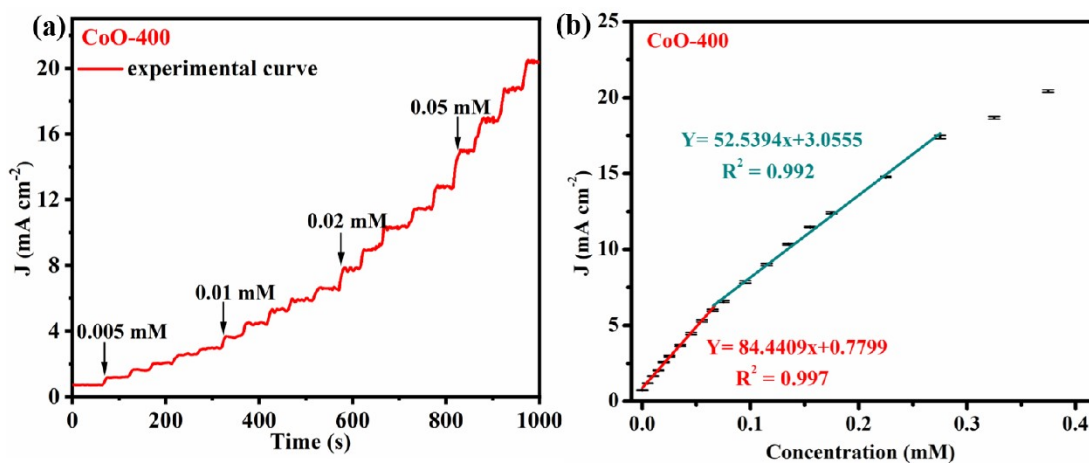

Figure S9. (a) Amperometric response of CoO-400 toward different concentration glucose at 0.5 V in 0.1 M KOH and (b) corresponding fitting curve.



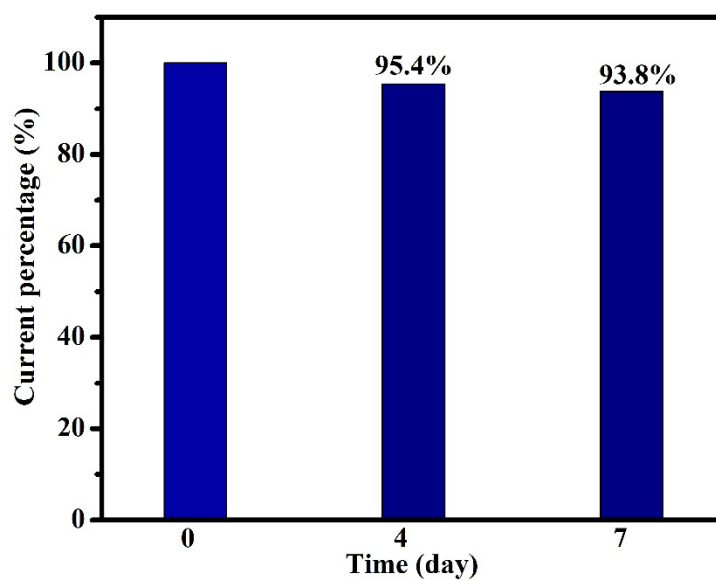

Figure S10. The long-term stability of the CoO-400 electrode after glucose sensing.

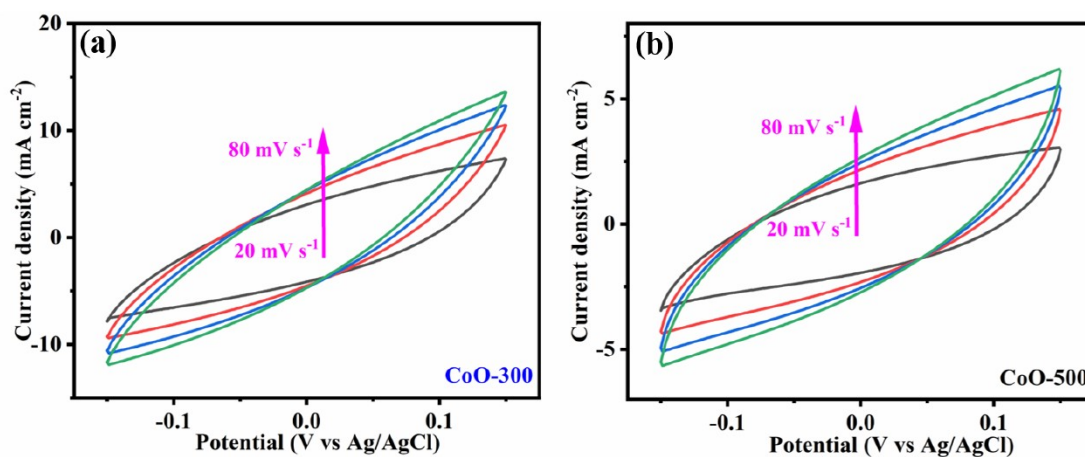

Figure S11. CV curves measured at different scan rate for (a) CoO-300 nanoneedles and (b) CoO-500 nanoneedles.
